# Supplementary material for: Visible Light Trapping against Charge Recombination in FeOx–TiO2 Photonic Crystal Photocatalysts
Source: MDPI journal article supplement (doi:10.3390/ma14237117), 2021-11-23
Supplement: s1 [file s1]

# Visible Light Trapping against Charge Recombination in FeO<sub>x</sub>–TiO<sub>2</sub> Photonic Crystal Photocatalysts

Martha Pylarinou <sup>1</sup>, Alexia Toumazatou <sup>1</sup>, Elias Sakellis <sup>2</sup>, Evangelia Xenogiannopoulou <sup>2</sup>, Spiros Gardelis <sup>1</sup>, Nikos Boukos <sup>2</sup>, Athanasios Dimoulas <sup>2</sup> and Vlassis Likodimos <sup>1,\*</sup>

<sup>1</sup> Section of Condensed Matter Physics, Department of Physics, National and Kapodistrian University of Athens, University Campus, 15 784, Greece

<sup>2</sup> Institute of Nanoscience and Nanotechnology, National Center for Scientific Research “Demokritos”, 15341 Agia Paraskevi, Athens, Greece

\* Correspondence: vlikodimos@phys.uoa.gr; Tel.: +30 2107276824

## S1. PBG determination from specular reflectance

The stop band positions were estimated by modified Bragg’s law for first order diffraction from the (111) fcc planes [1]:

$$\lambda = 2d_{111}\sqrt{n_{eff}^2 - \sin^2\theta},$$

where  $\lambda$  is the stop band wavelength,  $d_{111} = \sqrt{\frac{2}{3}} D$  is the spacing between (111) planes,  $D$  is the macropore diameter and  $n_{eff}^2 = n_{void}^2 f + n_{TiO_2}^2 (1 - f)$  is the volume-weighted average of the void spheres’ refractive index,  $n_{void}$ , and titania  $n_{TiO_2}$ , occupying the inverse opal frame, with  $f$  being the filling fraction ( $f = 0.74$  for the ideal fcc lattice) and  $\theta$  the angle between the incident beam and the plane normal. Using the experimental stop band wavelengths at  $\theta = 15^\circ$  along with the macropore diameters determined by SEM (Table 1) for  $n_{TiO_2} = 2.55$  and  $n_{air} = 1.0$ , the  $n_{eff}$  values and filling fractions  $(1 - f)$  were determined in air, as summarized in Table 1. In addition, using the obtained filling fractions and  $n_{H_2O} = 1.33$ , the stop band positions were estimated for the PC films in water, where the photocatalytic reaction takes place (Table 1).

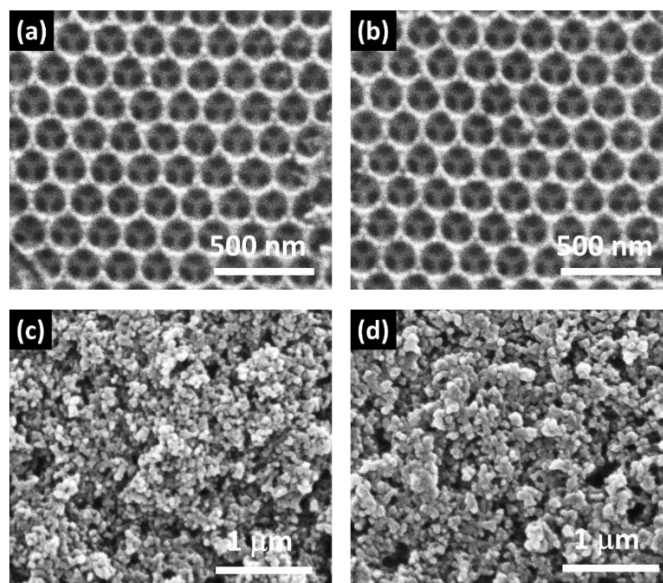

**Figure S1.** Top view SEM images of PC260 and P25 films (a), (c) before and (b), (d) after surface modification by two consecutive CC cycles of  $\text{Fe}(\text{acac})_3$ .

**Table S1.** Elemental EDX analysis of the  $\text{FeO}_x$ -modified PC and P25 films.

| Films                                 | Ti (at %) | Fe (at %) | Fe /Ti |
|---------------------------------------|-----------|-----------|--------|
| $\text{FeO}_x$ -PC220-1st             | 96,19     | 3,82      | 0,040  |
| $\text{FeO}_x$ -PC330-1 <sup>st</sup> | 96,49     | 3,51      | 0,036  |
| $\text{FeO}_x$ -PC260-1st             | 96,44     | 3,56      | 0,037  |
| $\text{FeO}_x$ -PC260-2nd             | 93,80     | 6,20      | 0,066  |
| $\text{FeO}_x$ -PC260-3rd             | 90,69     | 9,31      | 0,103  |
| $\text{FeO}_x$ -P25-1st               | 97,26     | 2,74      | 0,028  |
| $\text{FeO}_x$ -P25-2nd               | 94,15     | 5,85      | 0,062  |
| $\text{FeO}_x$ -P25-3rd               | 90,26     | 9,74      | 0,108  |

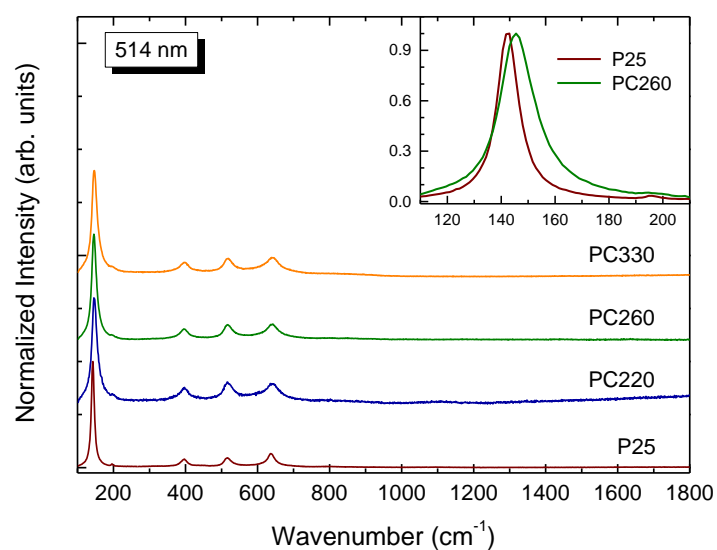

**Figure S2.** Raman spectra for the pristine and CCC modified PC and P25 films at 514 nm. The inset compares the lowest frequency anatase  $E_g$  mode for the PC260 and P25 films.

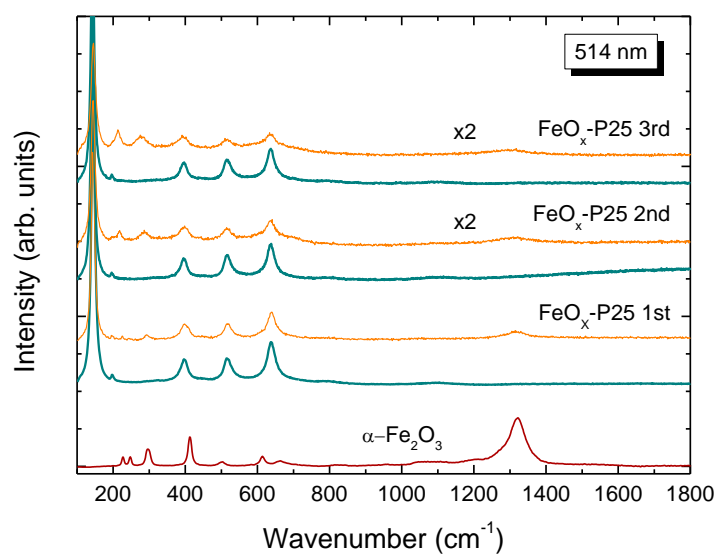

**Figure S3.** Raman spectra for the FeO<sub>x</sub>-P25 films (thick lines) at 514 nm. Thin lines display the corresponding Raman spectra after local annealing experiments performed by focusing the 514 nm laser beam by the 100 $\times$  objective at full laser power (2.5 mW) for 60 s on the films followed by normal acquisition on the same spot at low laser power (0.05 mW/ $\mu\text{m}^2$ ). The reference spectrum of nanocrystalline hematite  $\alpha\text{-Fe}_2\text{O}_3$  powder is shown for comparison at 514 nm.

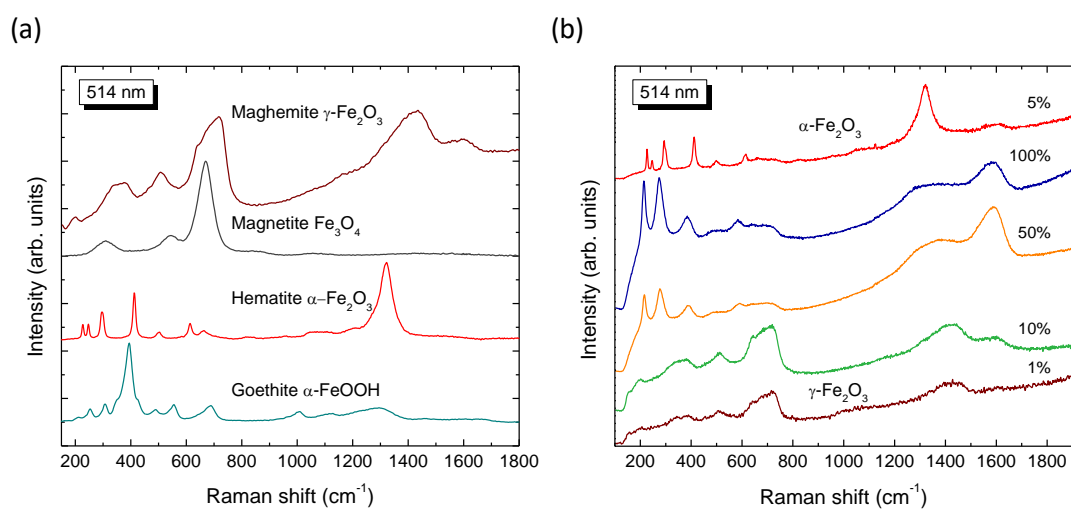

**Figure S4.** (a) Reference Raman spectra of representative iron oxides at 514 nm. (b) Raman spectra acquired on maghemite ( $\gamma\text{-Fe}_2\text{O}_3$ ) nanoparticles after local laser annealing experiments at variable densities of the full laser power (2.5 mW) for 60 s.

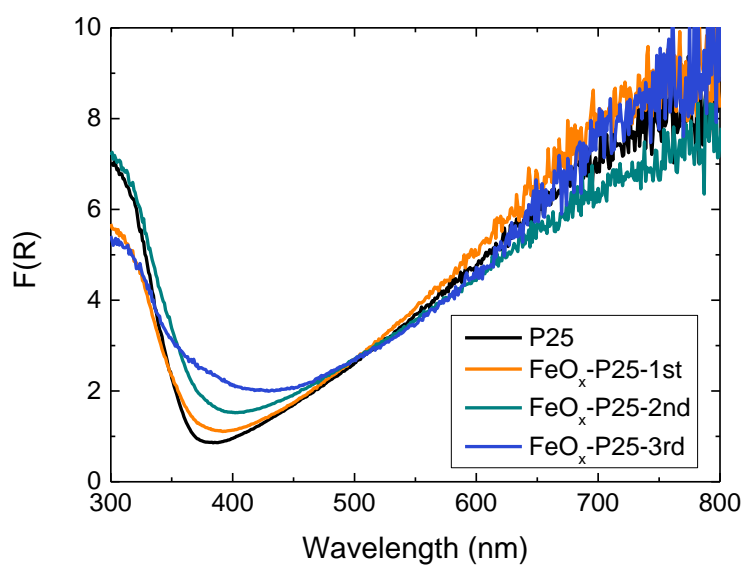

**Figure S5.** Kubelka-Munk transform function  $F(R)$  obtained from the DR (%) of the  $\text{FeO}_x\text{-P25}$  films.

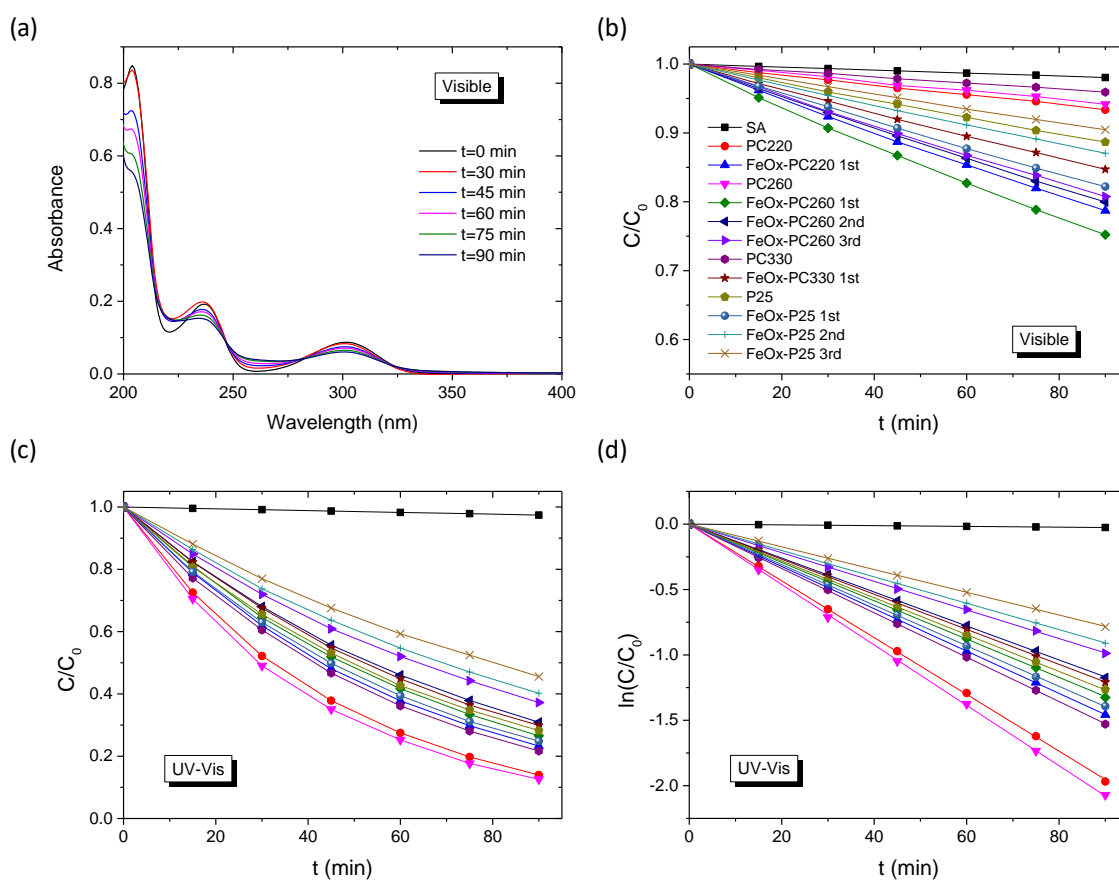

**Figure S6.** (a) SA absorbance spectra in the presence of FeO<sub>x</sub>-PC260-1st and SA photodegradation kinetics under (b) visible and (c), (d) UV-Vis light illumination for the pristine and FeO<sub>x</sub>-modified PC and P25 films.

## References

1. Stein, A., Wilson B.E., Rudisill S.G. Design and functionality of colloidal-crystal-templated materials-chemical applications of inverse opals. *Chem. Soc. Rev.* **2013**, 42, 2763–2803. <https://doi.org/10.1039/c2cs35317b>.
